# Supplementary material for: Novel in situ visualisation of rat intestinal absorption of polyphenols via matrix-assisted laser desorption/ionisation mass spectrometry imaging
Source: PubMed Central journal article supplement (PMC6395804; doi:10.1038/s41598-019-39405-w), 2019-02-28
Supplement: 41598_2019_39405_MOESM1_ESM.pdf [file 41598_2019_39405_MOESM1_ESM.pdf]

## Supplementary Information

**Novel *in situ* visualisation of rat intestinal absorption of polyphenols via matrix-assisted laser desorption/ionisation mass spectrometry imaging**

**Huu-Nghi Nguyen<sup>1#</sup>, Mitsuru Tanaka<sup>1#</sup>, Baorui Li<sup>1</sup>, Tomoya Ueno<sup>2</sup>, Hideki Matsuda<sup>2</sup> and Toshiro Matsui<sup>1\*</sup>**

<sup>1</sup> Division of Bioscience and Bioenvironmental Sciences, Faculty of Agriculture, Graduate School of Kyushu University, 744 Motooka, Nishi-ku, Fukuoka, 819-0395, Japan

<sup>2</sup>Division of Research and Development, Yaizu Suisankagaku Ind. Co. Ltd., 5-8-13 Kogawashinmachi, Yaizu, Shizuoka, 425-8570, Japan

# These authors contributed equally.

\*Correspondence to: Toshiro Matsui, Division of Bioscience and Bioenvironmental Sciences, Faculty of Agriculture, Graduate School of Kyushu University, 744 Motooka, Nishi-ku, Fukuoka, 819-0395, Japan

E-mail: [tmatsui@agr.kyushu-u.ac.jp](mailto:tmatsui@agr.kyushu-u.ac.jp)

Fax: +81-92-802-4752

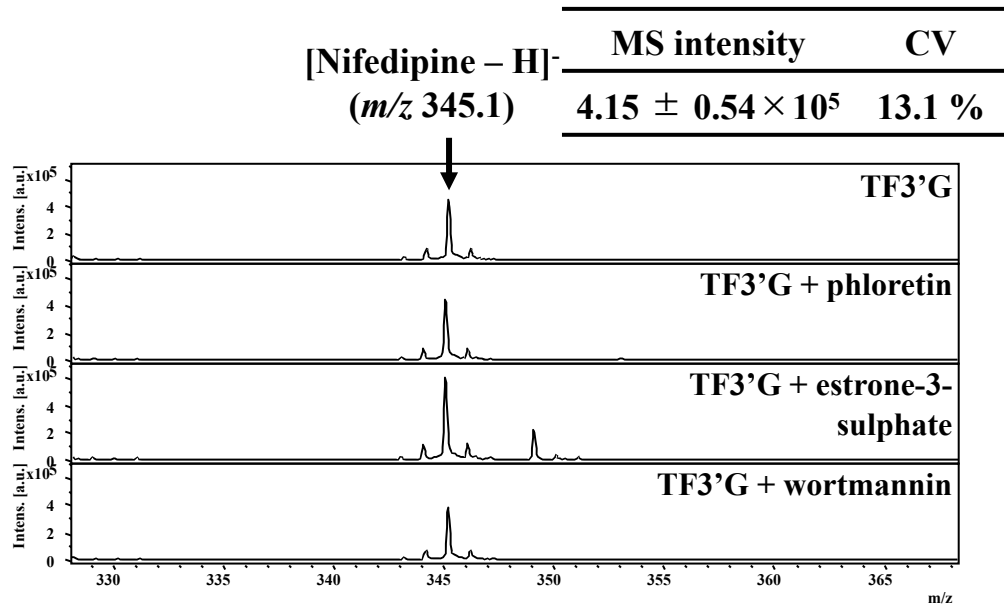

Figure S1. MALDI-MS spectra of nifedipine ( $[M-H]^-$   $m/z$  345.1) on jejunum membrane sections from 60-min transport experiments of TF3'G. The detail experimental conditions were described in Method section. The phytic acid-aided homogenous matrix crystal sprayed by an ImagePrep showed constant MS intensity of nifedipine (intensity:  $4.15 \pm 0.51 \times 10^5$ , CV: 13%) between different tissue sections.
